# Supplementary material
Source: PubMed Central journal article supplement (PMC2950653)

## SUPPLEMENTAL DATA

### Fig. S1. Pof6 protein's domains.

*A.* Alignment of several F-box protein domains from *S. pombe* (Pop1, Pof1, Pop2, Pof6) and human (Skp2). The sequences are aligned according to the residues conserved at the core interface of Skp1/Skp2 and Cul1/Skp2 as described in Schulman et al., 2000 [1] (residues underlined with bold stars). The amino acids conserved at the variable interface of Skp1/Skp2 are underlined with regular stars. A consensus sequence of the F-box domain is written in the line below the alignment. The two residues in red are not conserved in Pof6 and correspond to the core interface of Cul1/F-box domain [2]. *B.* Schematic of the domains identified in the Pof6 protein by NCBI specialized Blast search; F-box domain (blue): aa 33-77, two Sec10 domains (red): aa 211-430 and aa 541-824, CAAX domain (dark red): aa 852-872.

### Supplementary references

1. Schulman, B. A., Carrano, A. C., Bowen, Z., Kinnucan, E. R. E., Finnin, M. S., Elledge, S., Harper, J. W., Pagano, M., and Pavletich, N. P. (2000) *Nature [Lond.]* **408**, 381-386
2. Zheng, N., Schulman, B. A., Song, L., Miller, J. J., Jeffrey, P. D., Wang, P., Chu, C., Koepp, D. M., Elledge, S. J., Pagano, M., Conaway, R. C., Conaway, J. W., Harper, J. W., and Pavletich, N. P. (2002) *Nature* **416**(6882), 703-709

# Figure S1

## A

```

Pop1      LTGFPAEITNLVLTHTLDAPSLCAVSVSHHWYKLVSSNEELWKSIFLK
Skp2      WDSLPEILLGIFSCCLPELLKVSQVCKRWYRLAS-DESLWQTIDLT
Pof1      LSLLPVEISFRILSFLDARSLCQAAQVSKHWKELAD-DDVIWHRMCEQ
Pop2      LSNLPFSIVQSILLNLDIHSFLSCLVSPVTWNRILDVHTSYWKHMFSL
Pof6      FGCLTINIYLKIFTLISTPDLNCRLVCRKFQQLCDYNSIYVKKLLLM
Skp1 inter. * ** * * ** * * * * * * * * * * * * * * *
CUL1 inter.  * *
F-box motif LXXLPXEIXLXILXXLEXDLDLXLXXVCKRWXXLIXX-DXLWKKX

```

\*: Skp1/Skp2 CUL1/Skp2 core interface,

\*: Skp1/Skp2 variable interface, from Schulman et al.,2000

## B

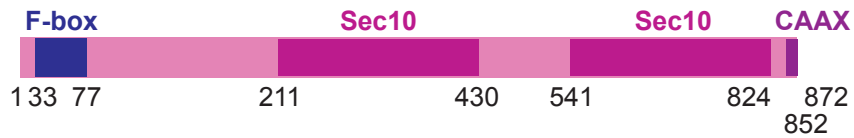

Supplement: NIHMS234341-supplement-Supplementary_Data.pdf [file NIHMS234341-supplement-Supplementary_Data.pdf]
